# Supplementary figures and images for: A neutrophil membrane-functionalized black phosphorus riding inflammatory signal for positive feedback and multimode cancer therapy
Source: Royal Society of Chemistry journal article supplement (doi:10.1039/c9mh01068h), 2019-10-21

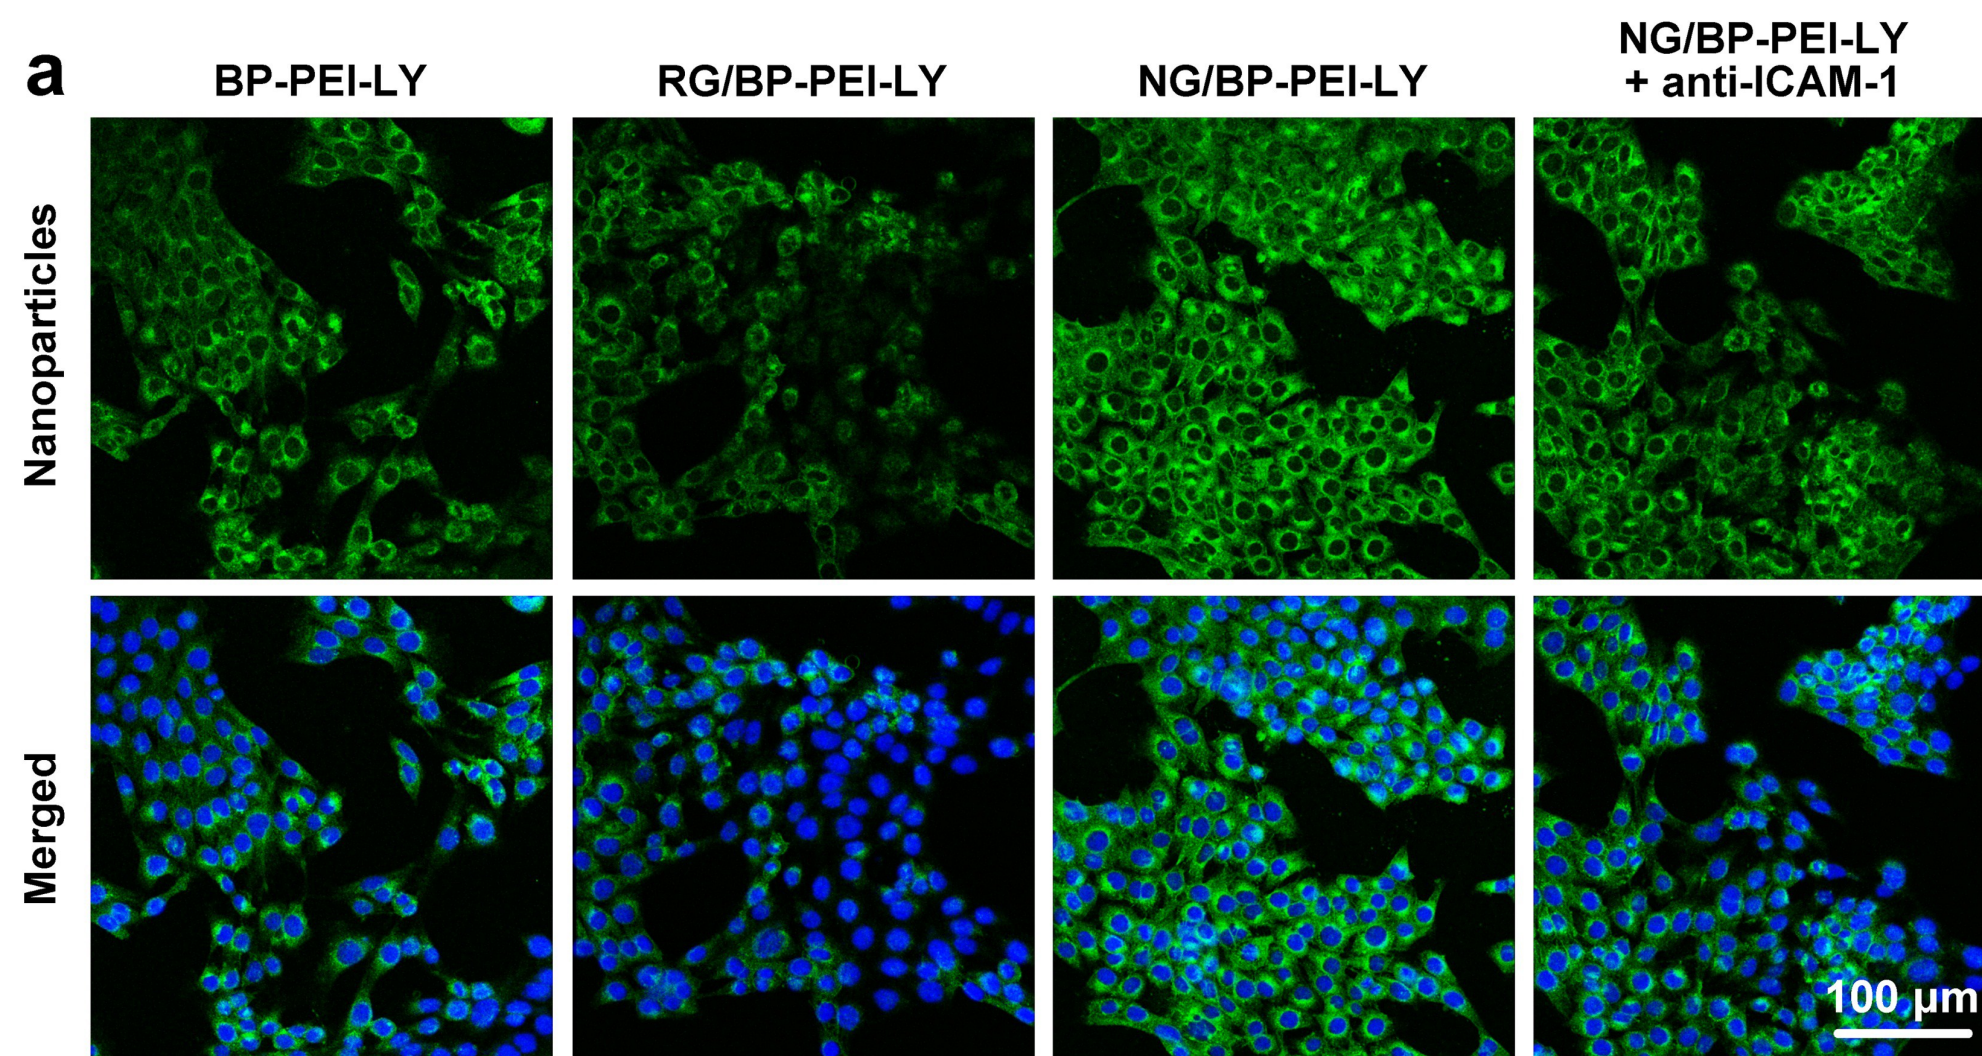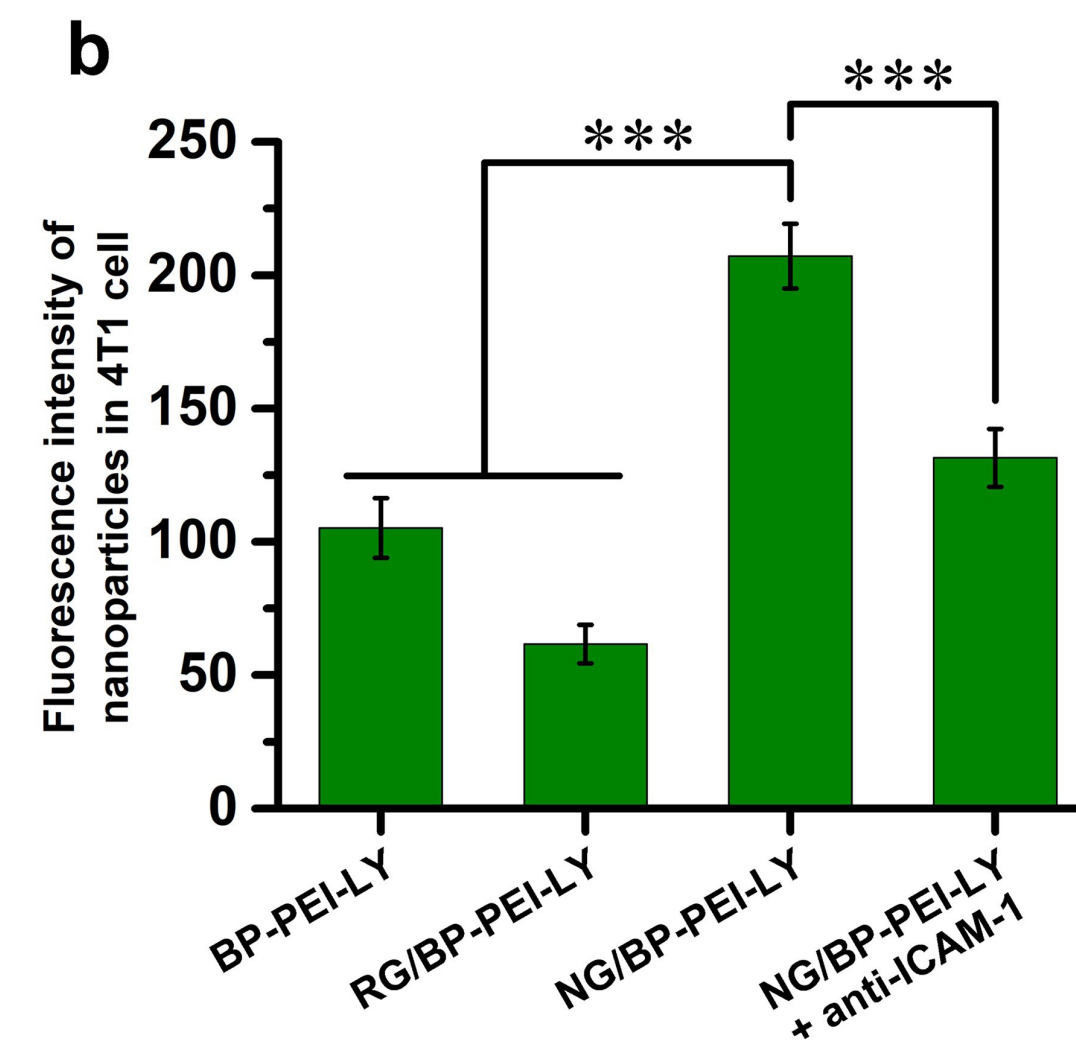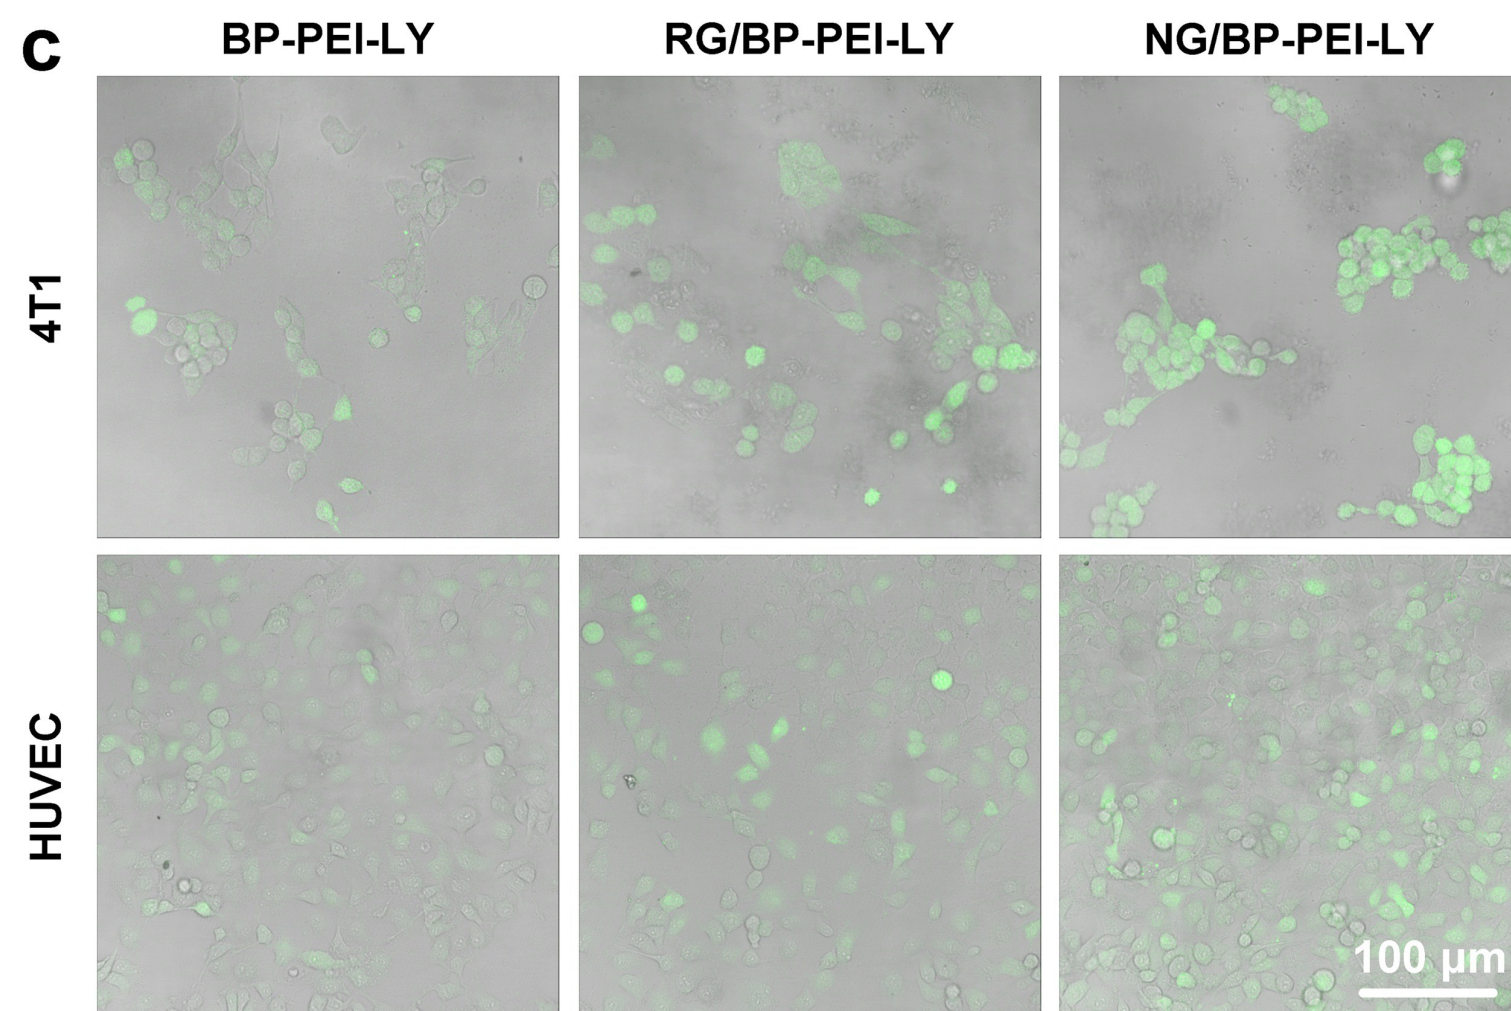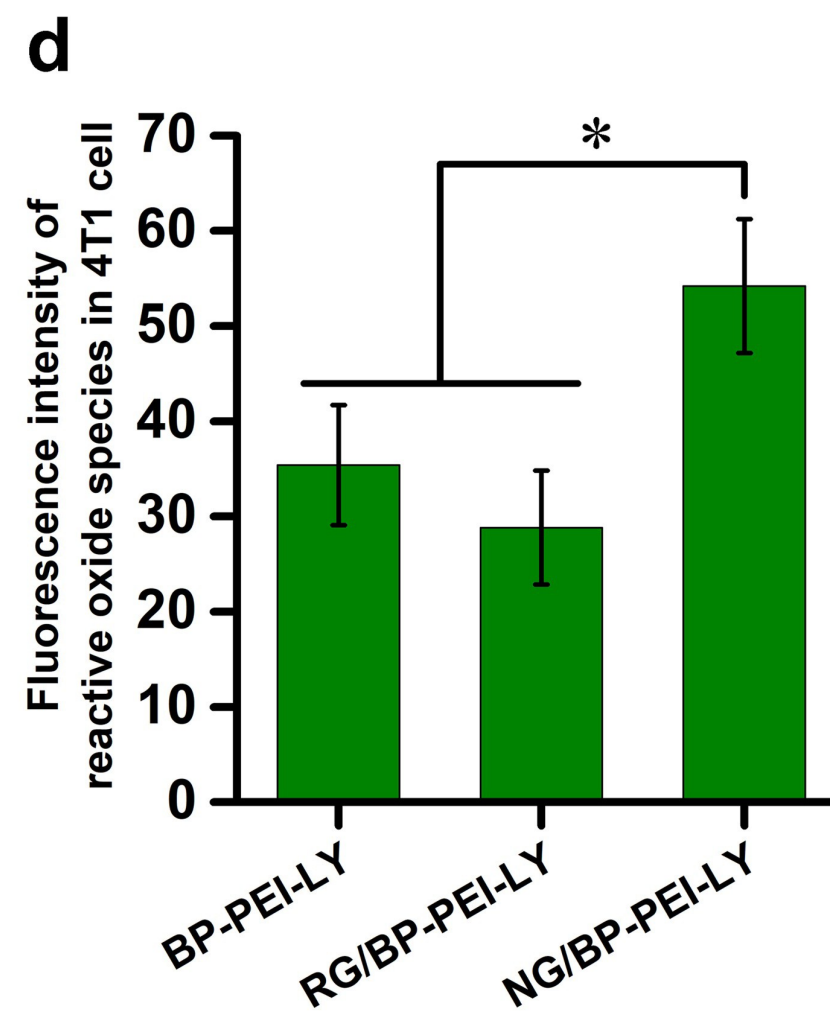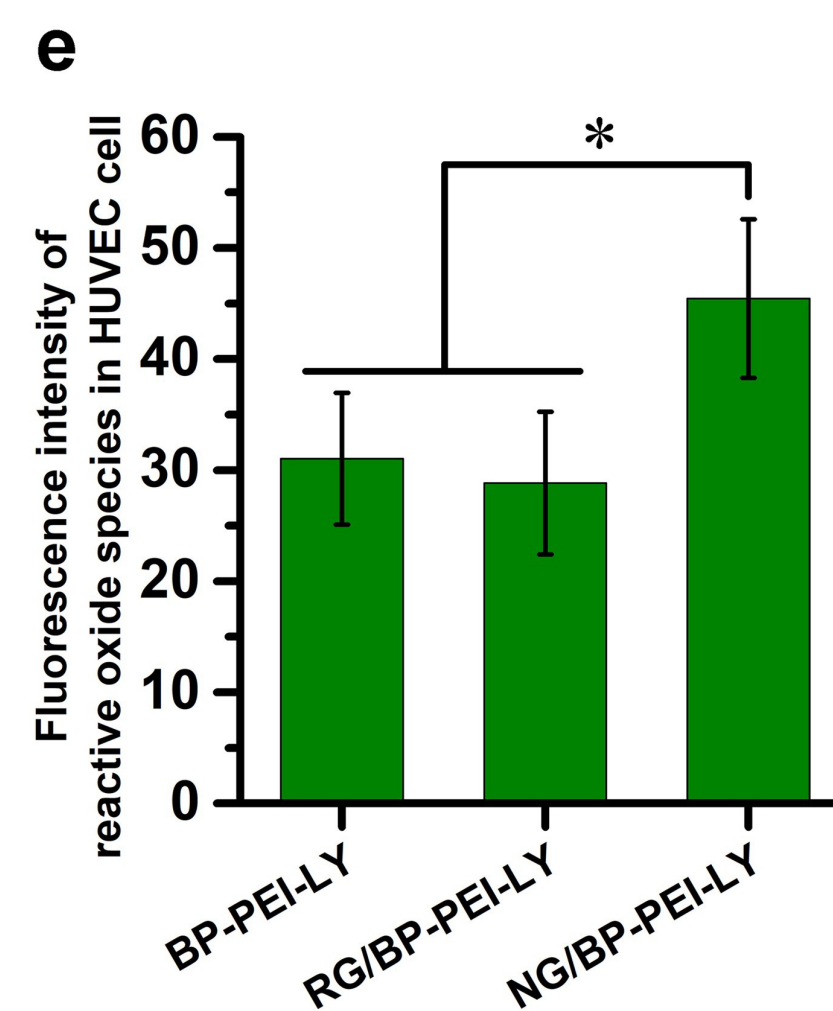

Supplement: c9mh01068h2.pdf [file c9mh01068h2.pdf]
